# Supplementary material
Source: PubMed Central journal article supplement (PMC6071873)

uncropped versions of SDS-PAGE gels

Supplementary Information Figure 1

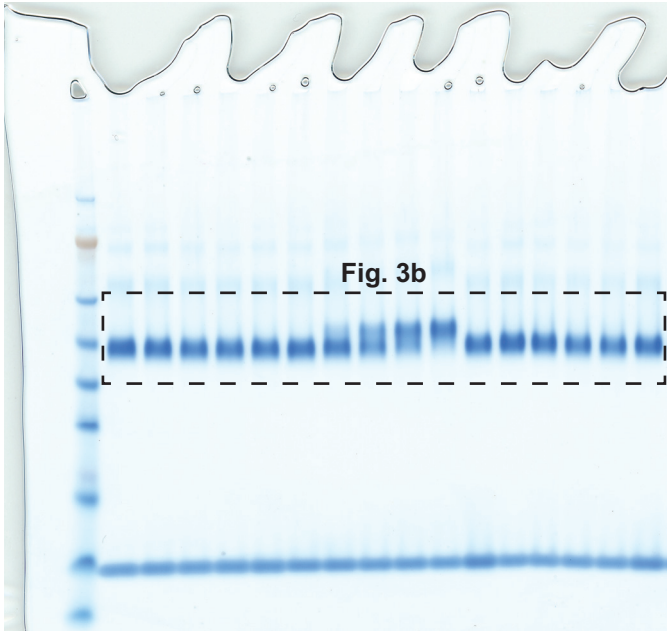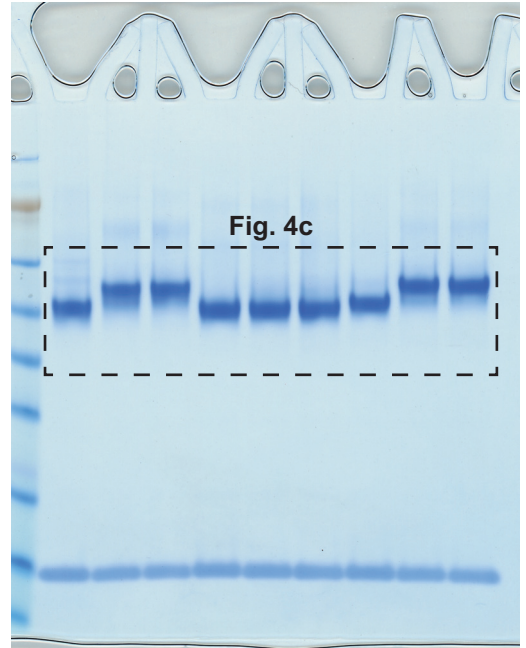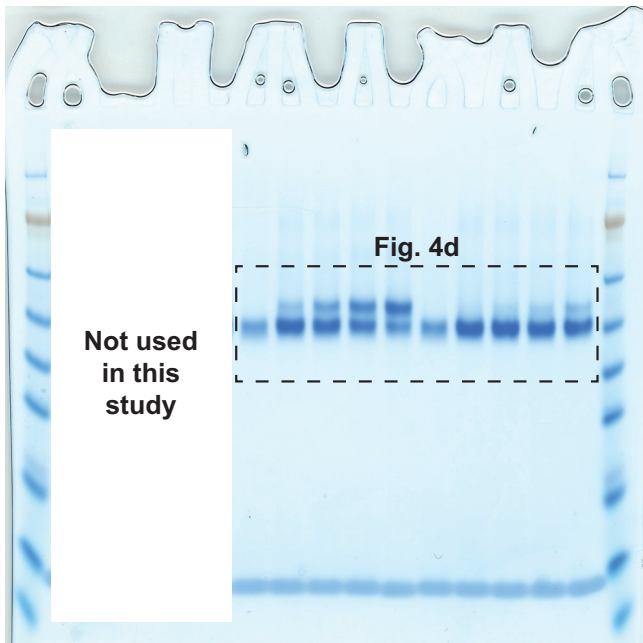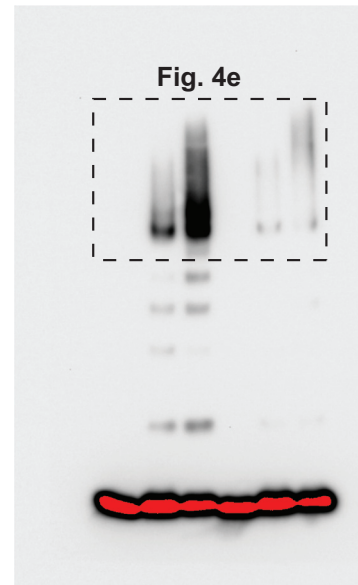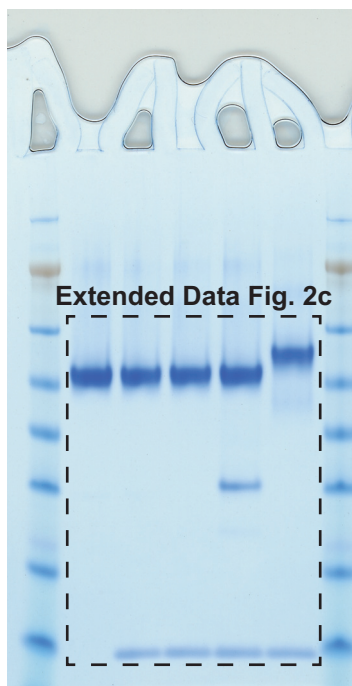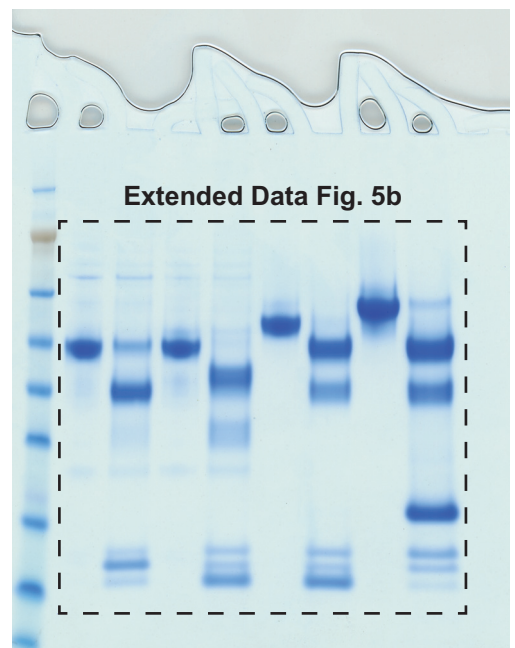

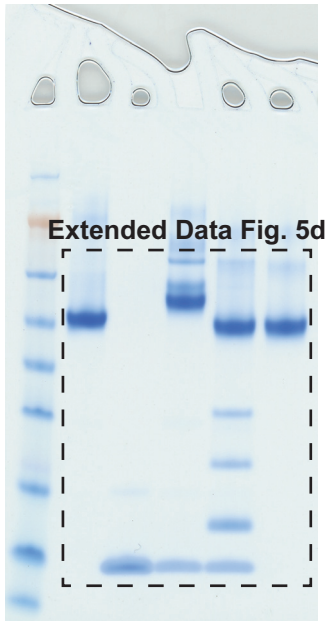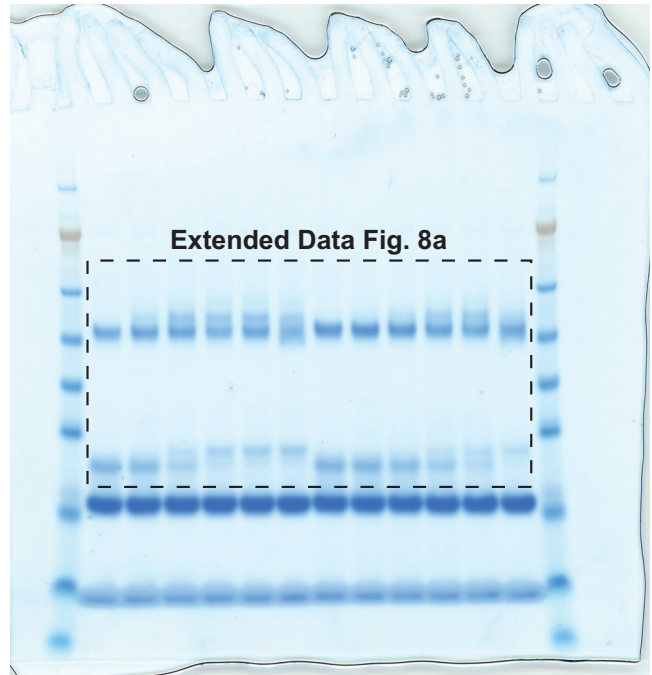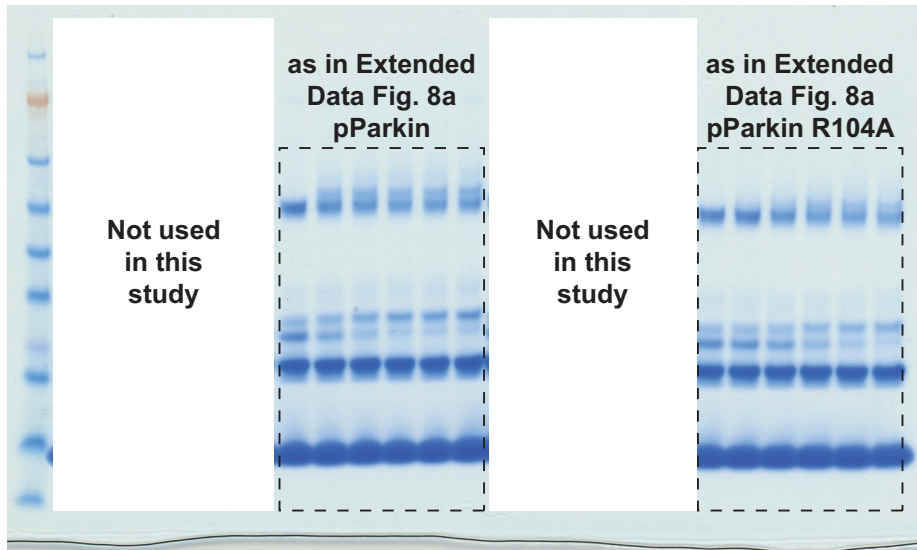

Supplement: NIHMS78394-supplement-Supplementary_Information.pdf [file NIHMS78394-supplement-Supplementary_Information.pdf]
